# Supplementary material for: Deletion of Calhm2 alleviates MPTP-induced Parkinson's disease pathology by inhibiting EFHD2-STAT3 signaling in microglia
Source: PubMed Central journal article supplement (PMC10091876; doi:10.7150/thno.83082), 2023-03-13
Supplement: thnov13p1809s1.pdf [file thnov13p1809s1.pdf]

1 **Supplementary Figure legends:**

2 **Figure S1: The expression of Calhm2 in Calhm2 WT and Calhm2 KO mice brain**  
3 **tissue.** (A) Quantitative PCR of expression of Calhm2 in Calhm2 WT and Calhm2 KO  
4 mice brain tissue. Statistical results are shown as mean  $\pm$  S.E.M,  $*P < 0.05$ ,  $**P < 0.01$ ,  
5  $***P < 0.001$ .

6 **Figure S2: The expression of Calhm2 in isolated microglia from Calhm2 flox/flox**  
7 **mice and Calhm2 flox/flox;Cx3cr1-CreER mice.** (A) Quantitative PCR of expression  
8 of Calhm2 in isolated microglia from Calhm2 flox/flox mice and Calhm2  
9 flox/flox;Cx3cr1-CreER mice. Statistical results are shown as mean  $\pm$  S.E.M,  $*P < 0.05$ ,  
10  $**P < 0.01$ ,  $***P < 0.001$ .

11 **Figure S3: The genotyping and immunoprecipitation of HA-Calhm2 in mouse**  
12 **brain tissue.** (A) The genotyping result of Calhm2 WT mice and Calhm2-HA mice. (B)  
13 The brain tissue from Calhm2 WT mice and Calhm2-HA mice were lysed and  
14 immunoprecipitated with HA antibody, and then immunoblotting with anti-HA antibody.

15 **Figure S4: Calhm2 does not impair EFhd2 protein levels.** (A) Expression of EFhd2  
16 in Calhm2 WT and Calhm2 KO primary microglia by immunoblotting after LPS  
17 stimulation at different time points. (B) Expression of EFhd2 in control and Calhm2  
18 overexpression IBMDM cells after LPS stimulation at different time points.

**A**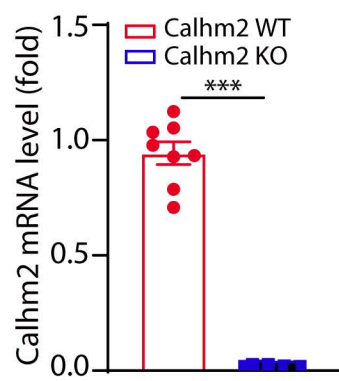

A

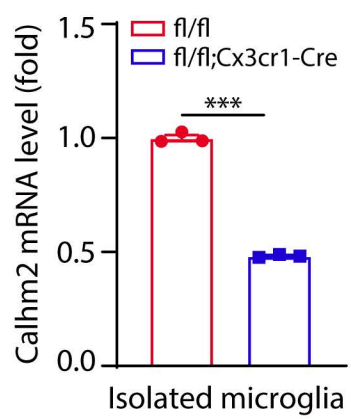



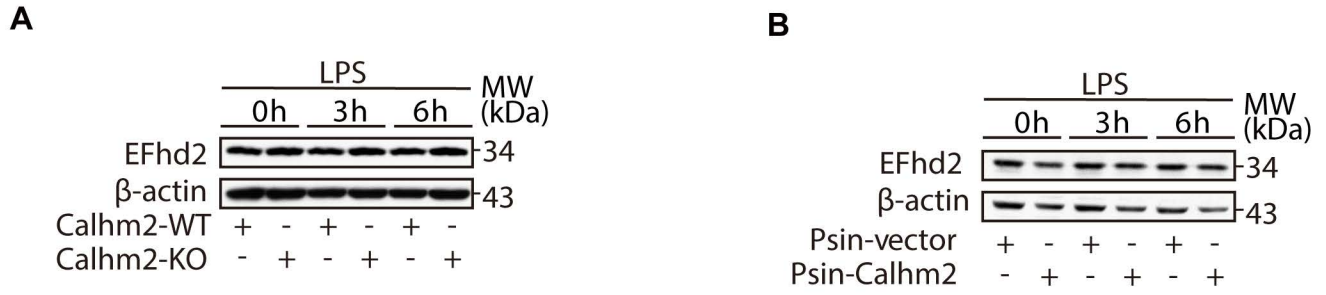

1 **Supplementary Table 1**

| Reagents or resource          | Source                    | Identifier                  |
|-------------------------------|---------------------------|-----------------------------|
| <b>Antibody</b>               |                           |                             |
| TH                            | Pel-Freez                 | P40101-150                  |
| TH                            | Cell Signaling Technology | 2792                        |
| Iba1                          | NOVUS                     | NB100-1028                  |
| Iba1                          | WAKO                      | NCNP24                      |
| GFAP                          | Sigma                     | G3893                       |
| EFhd2                         | ZEN-BIOSCIENCE            | 163761                      |
| Stat3                         | ZEN-BIOSCIENCE            | 251219                      |
| p-stat3                       | ZEN-BIOSCIENCE            | 381552                      |
| HA                            | Cell Signaling Technology | 3724S                       |
| Myc                           | abcam                     | Ab32                        |
| Photyrosine                   | MILLIPORE                 | 16-454                      |
| $\beta$ -actin                | Proteintech               | 66009-1-1g                  |
| GAPDH                         | Cwbiotech                 | CW0100A                     |
| <b>Chemicals &amp; probes</b> |                           |                             |
| Tamoxifen                     | Sigma-Aldrich             | T5648                       |
| Corn oil                      | Sigma-Aldrich             | C8267                       |
| MPTP                          | Sigma-Aldrich             | M0896-100MG                 |
| LPS                           | Merck Millipore           | LPS25                       |
| MPP <sup>+</sup>              | Sigma-Aldrich             | D048-100MG                  |
| Triton X-100                  | Sigma-Aldrich             | 9036-19-5                   |
| CD11b MicroBeads              | Miltenyi Biotec           | 130-093-634                 |
| HA beads                      | Bimake                    | B26201                      |
| Protein A/G                   | Bimake                    | B23201                      |
| Myc beads                     | Bimake                    | B26301                      |
| <b>Primers</b>                |                           |                             |
| Mouse <i>Calhm2</i>           | Forward                   | 5'-CCTGACCAAGTGCCTCAAACA-3' |

|                      |         |                                                                          |
|----------------------|---------|--------------------------------------------------------------------------|
|                      | Reverse | 5'-GGTCCTCGTTGGTACGGTACTG-3'                                             |
| Mouse <i>Tnf-α</i>   | Forward | 5'-CAGGCGGTGCCTATGTCTC-3'                                                |
|                      | Reverse | 5'-CGATCACCCCGAAGTTCAGTAG-3'                                             |
| Mouse <i>Inos</i>    | Forward | 5'-GTTCTCAGCCCAACAATACAAGA-3'                                            |
|                      | Reverse | 5'-GTGGACGGGTCGATGTCAC-3'                                                |
| Mouse <i>Il-1β</i>   | Forward | 5'-TGTAATGAAAGACGGCACACC-3'                                              |
|                      | Reverse | 5'-TCTTCTTTGGGTATTGCTTGG-3'                                              |
| Mouse <i>Il-6</i>    | Forward | 5'-GCTACCAAACCTGGATATAATCAGGA-3'                                         |
|                      | Reverse | 5'-CCAGGTAGCTATGGTACTCCAGAA-3'                                           |
| Mouse <i>β-actin</i> | Forward | 5'-GGCTGTATTCCCCTCCATCG-3'                                               |
|                      | Reverse | 5'-CCAGTTGGTAACAATGCCATGT-3'                                             |
| shCalhm2             | Forward | 5'-CCGGGTCTGTGCTCTCAGTGAGTTTCT<br>CGAGAACTCACTGAGAGCACAGACTTT<br>TTTG-3' |
|                      | Reverse | 5'-AATTCAAAAAGTCTGTGCTCTCAGTGA<br>GTTTCTCGAGAACTCACTGAGAGCACA<br>GAC-3'  |
| shEFhd2-1            | Forward | 5'-CCGGCGTTTGCCTCAGCGGATACTCGA<br>GTATCCGCTGAGGCA AACGTTTTTG-3'          |
|                      | Reverse | 5'-AATTCAAAAACGTTTGCCTCAGCGGAT<br>ACTCGAGTATCCGCTG AGGCAAACG-3'          |
| shEFhd2-2            | Forward | 5'-CCGGGAGAAGATGTTCAAGCAGTATCT<br>CGAGATACTGCTTGAACATCTTCTTTTT<br>G-3'   |
|                      | Reverse | 5'-AATTCAAAAAGAGAAGATGTTCAAGC<br>AGTATCTCGAGATACTGCTTGAACATCTTC<br>TC-3' |
